# Supplementary material
Source: PubMed Central journal article supplement (PMC6003778)

# Figure S1

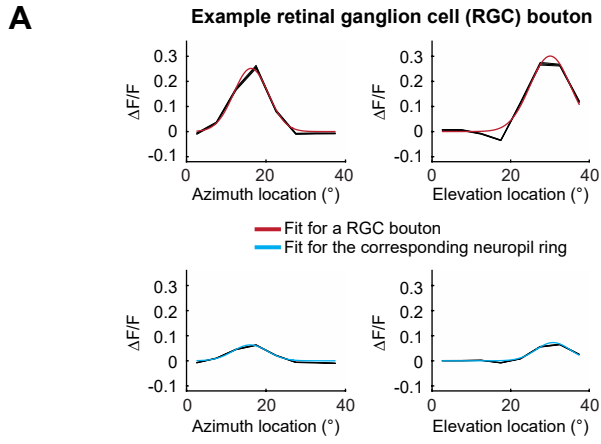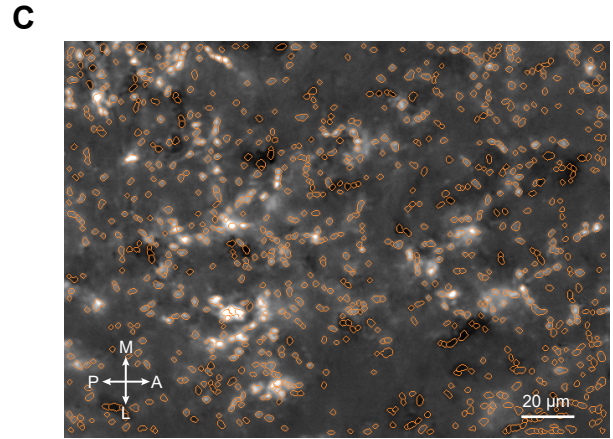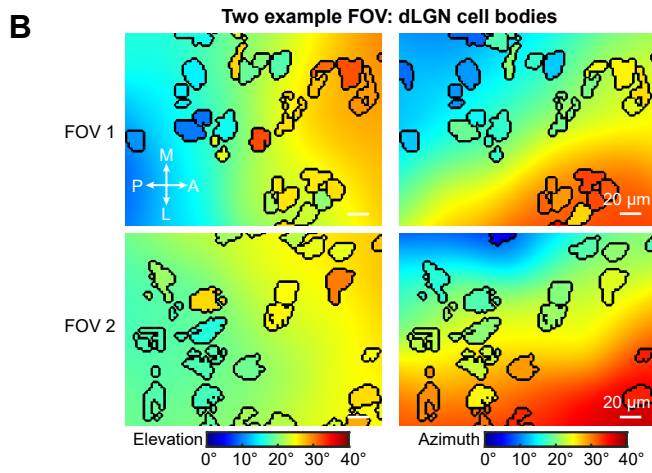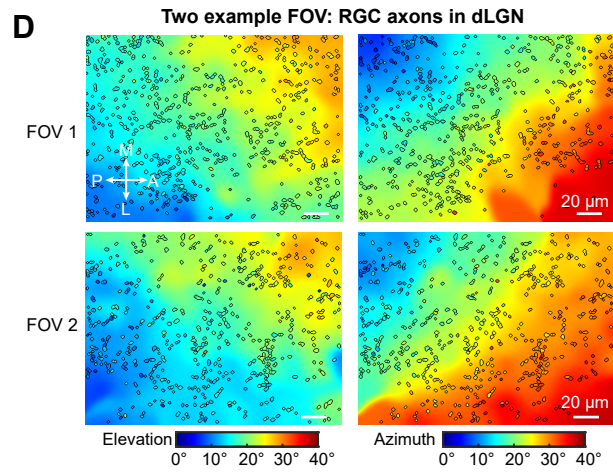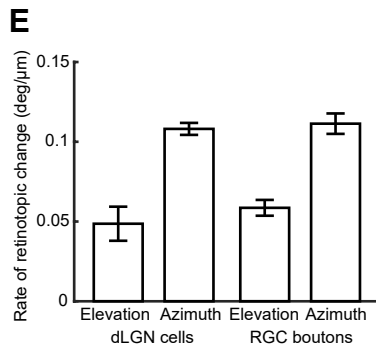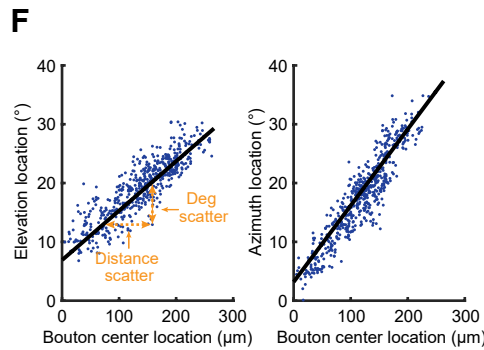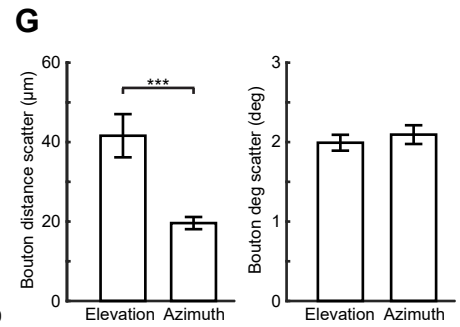

**H** Example direction tuning curves: neighboring dLGN cell bodies

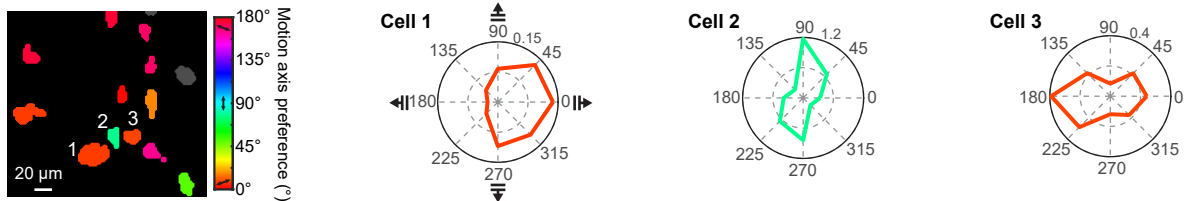

Supplement: NIHMS971485-supplement-1.pdf [file NIHMS971485-supplement-1.pdf]

Figure S2

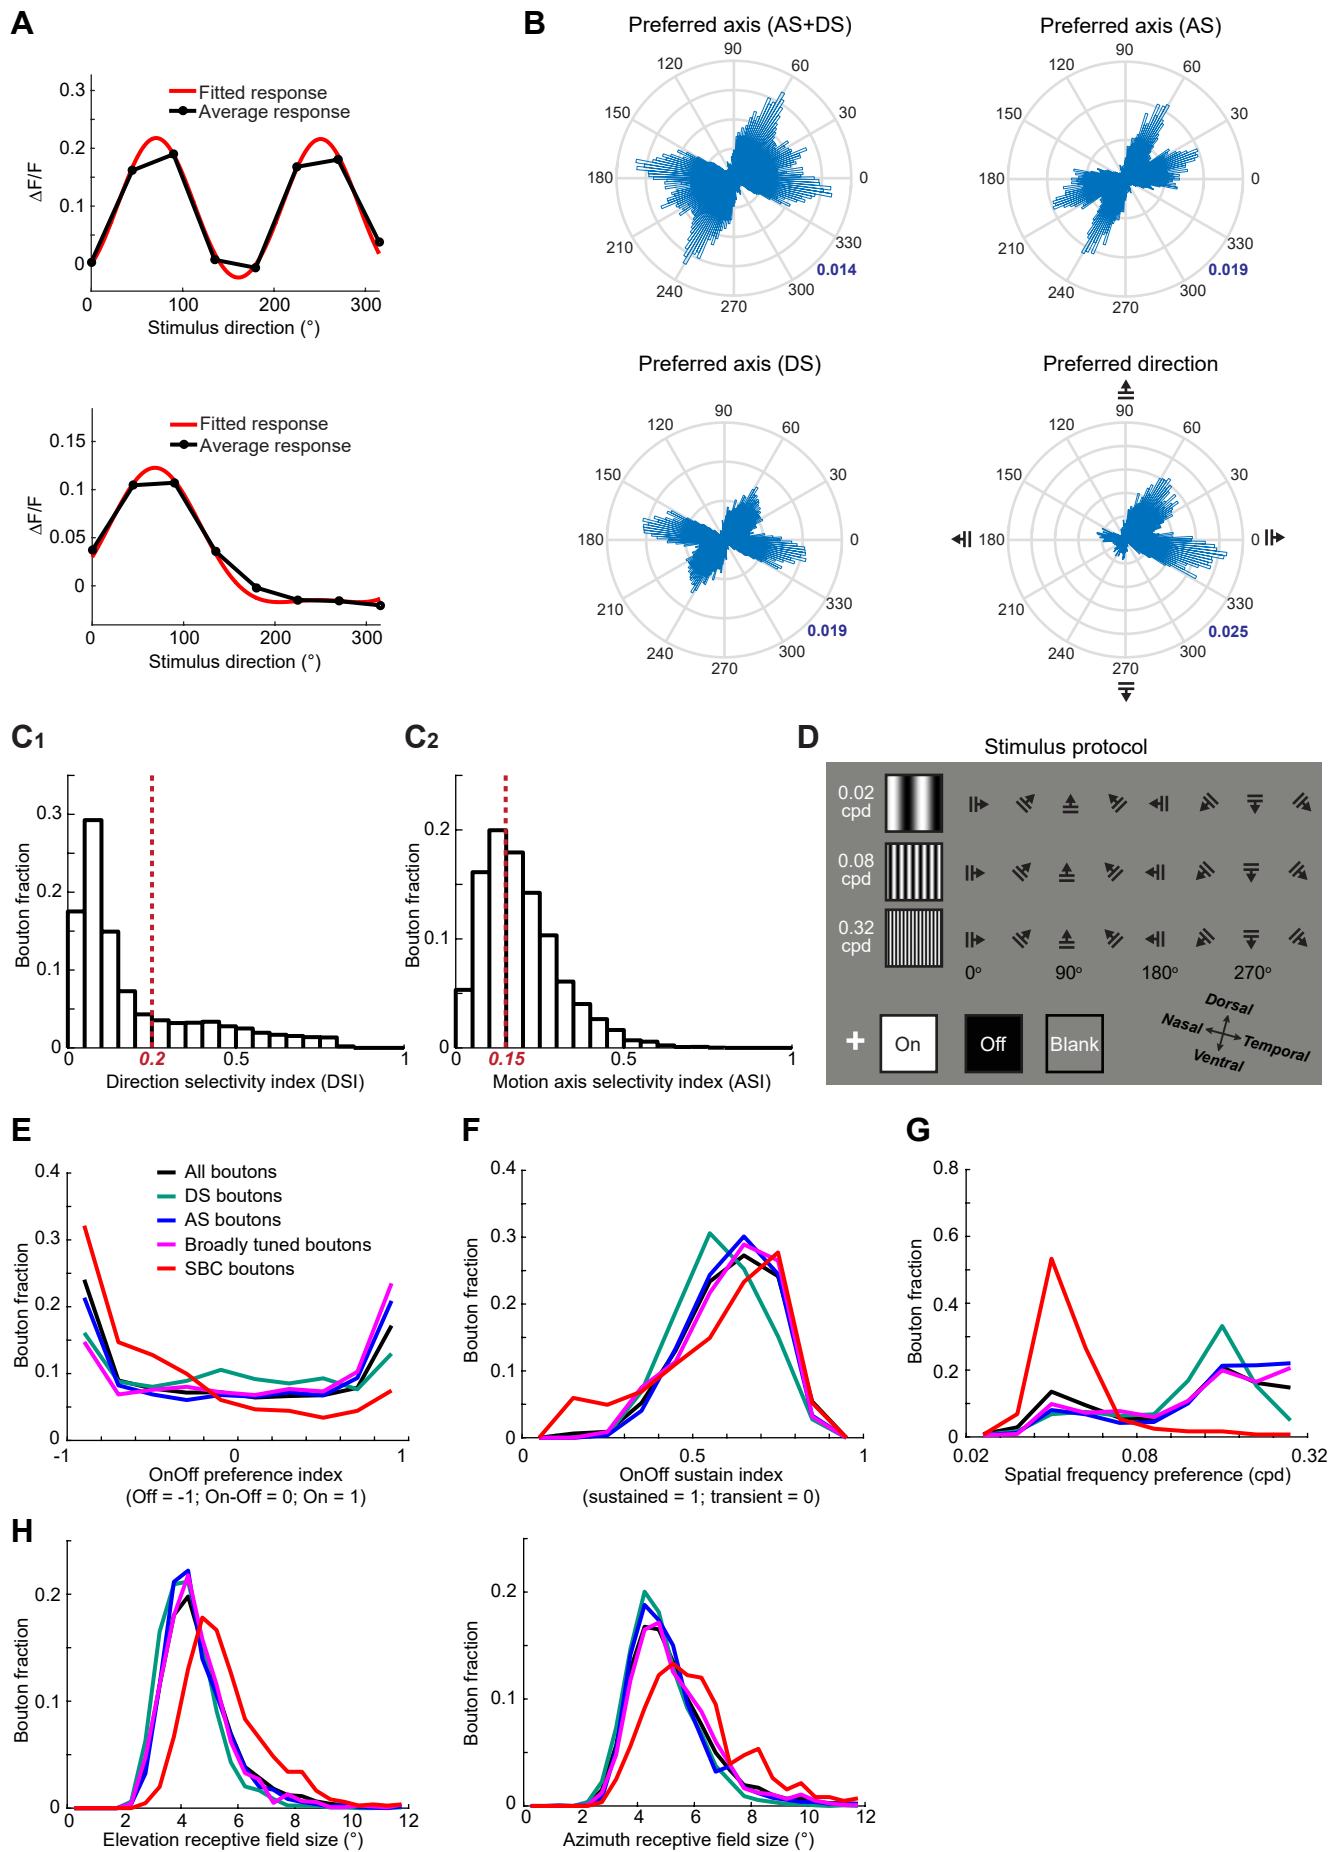

Supplement: NIHMS971485-supplement-2.pdf [file NIHMS971485-supplement-2.pdf]

# Figure S3

**A**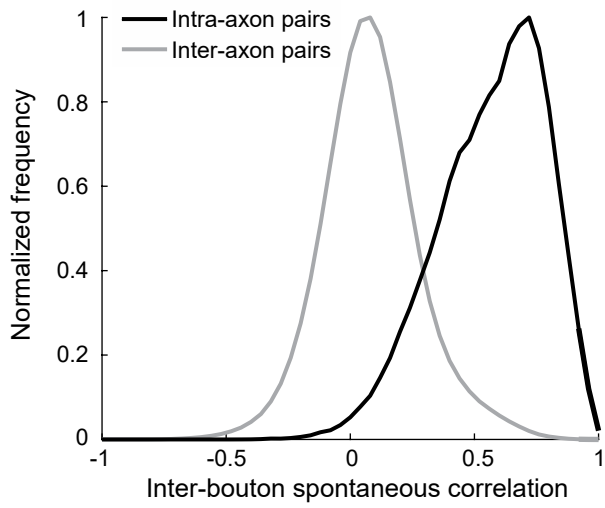**B**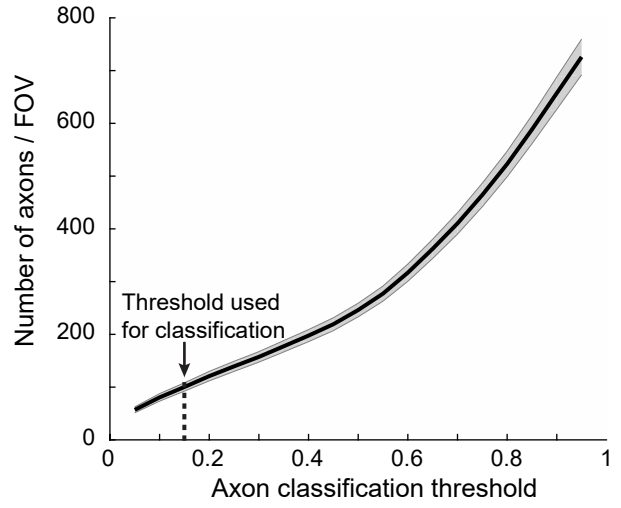**C**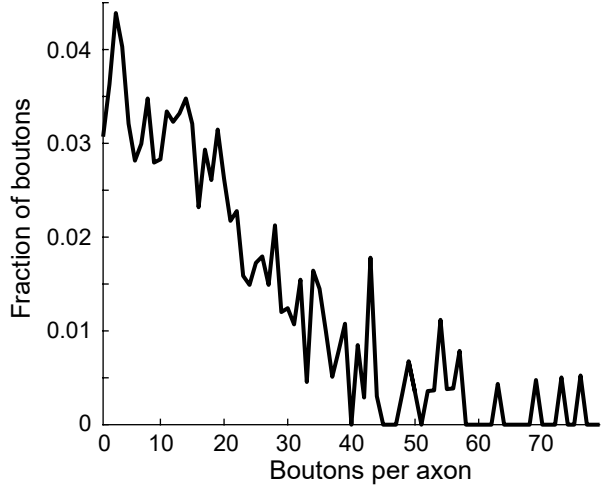**D**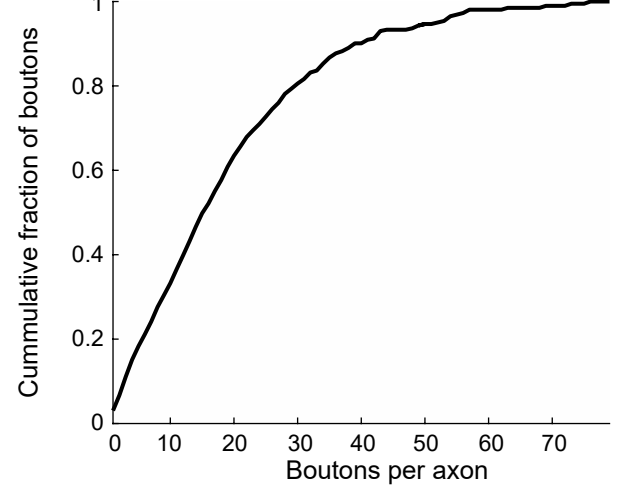**E**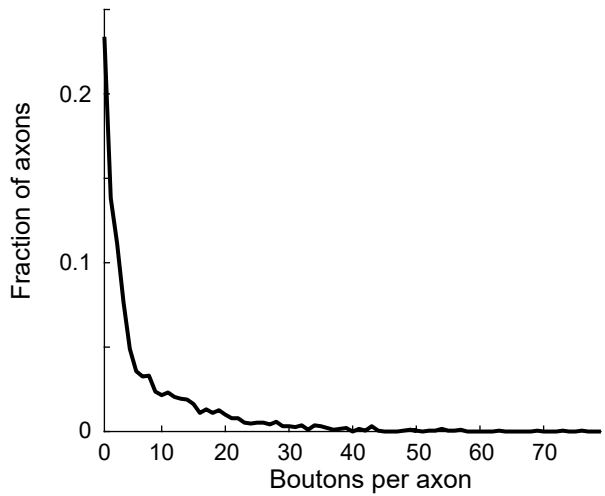**F**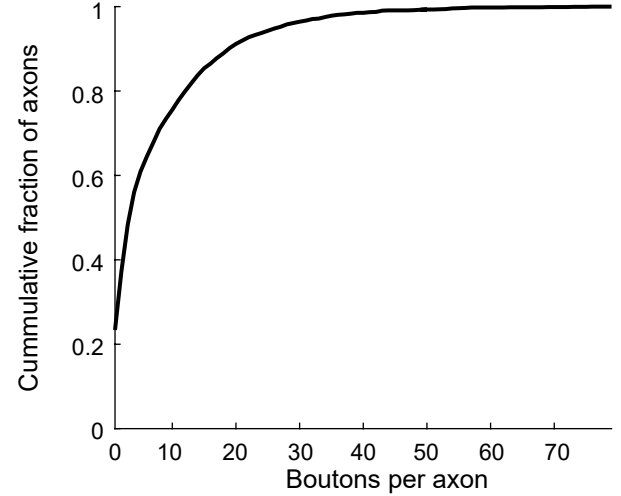

Supplement: NIHMS971485-supplement-3.pdf [file NIHMS971485-supplement-3.pdf]

# Figure S4

**A**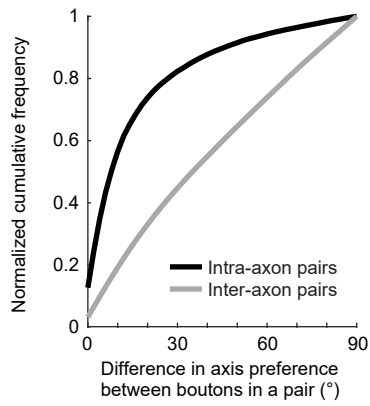**B**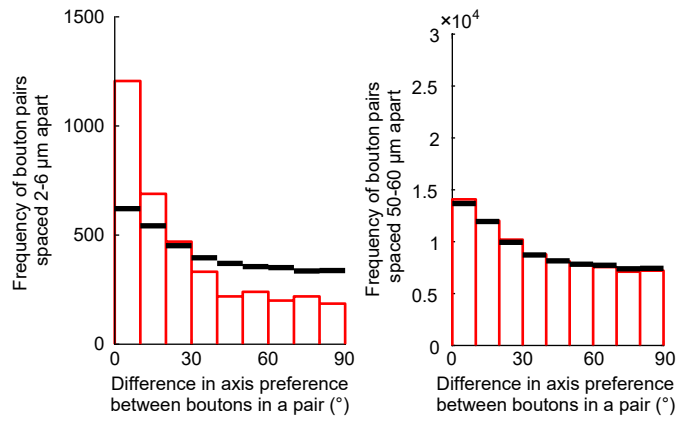**C**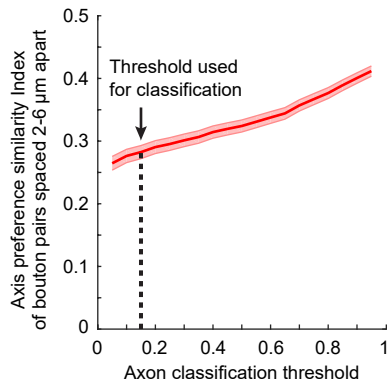**D1**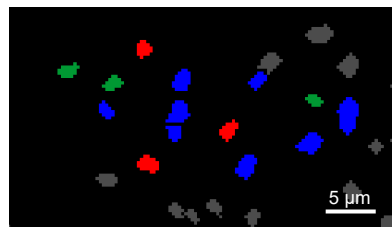**D2**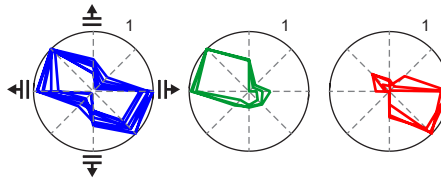**E**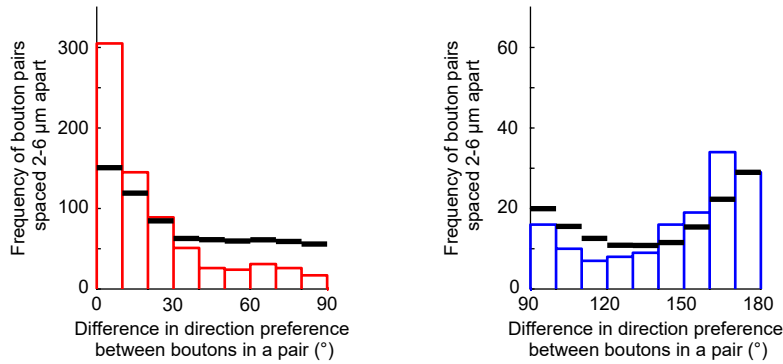

Supplement: NIHMS971485-supplement-4.pdf [file NIHMS971485-supplement-4.pdf]

Figure S5

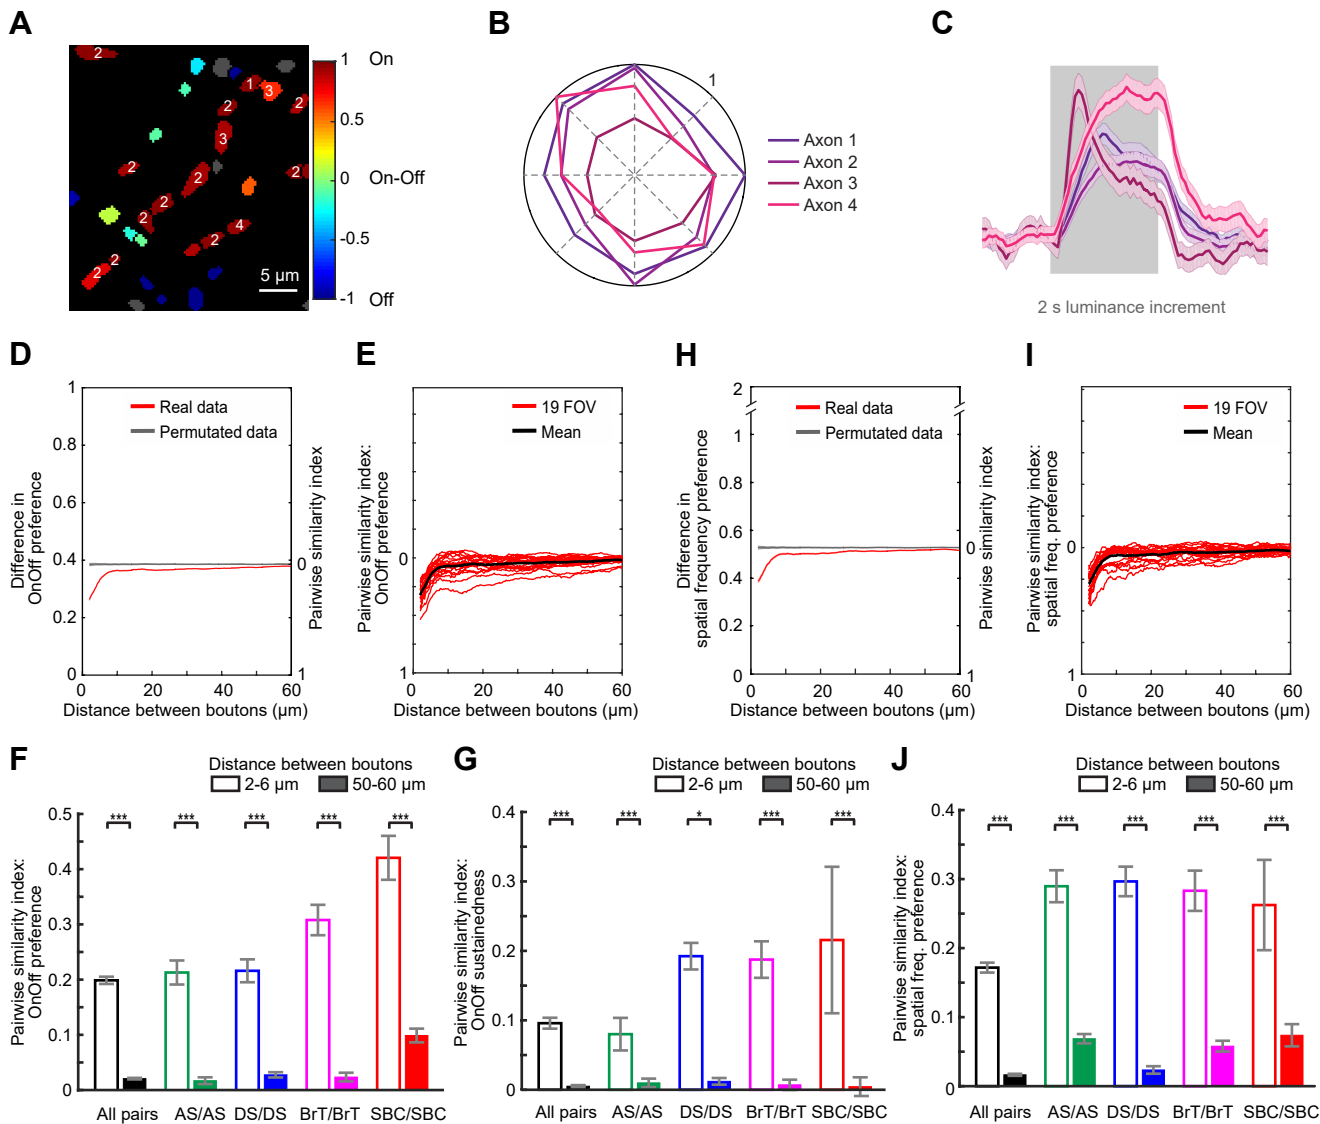

Supplement: NIHMS971485-supplement-5.pdf [file NIHMS971485-supplement-5.pdf]

# Figure S6

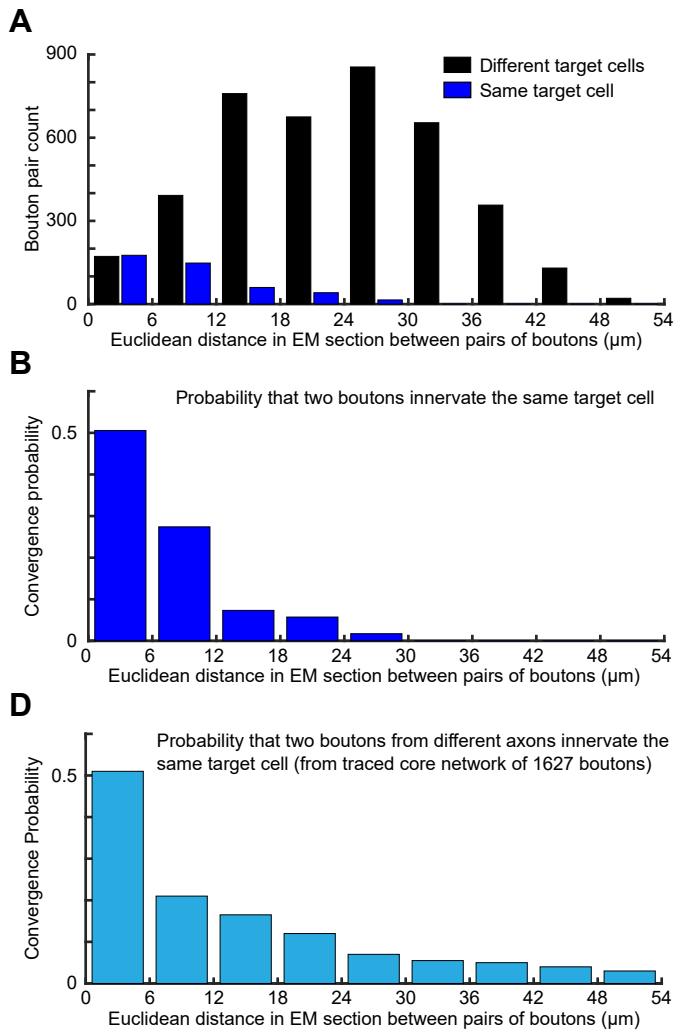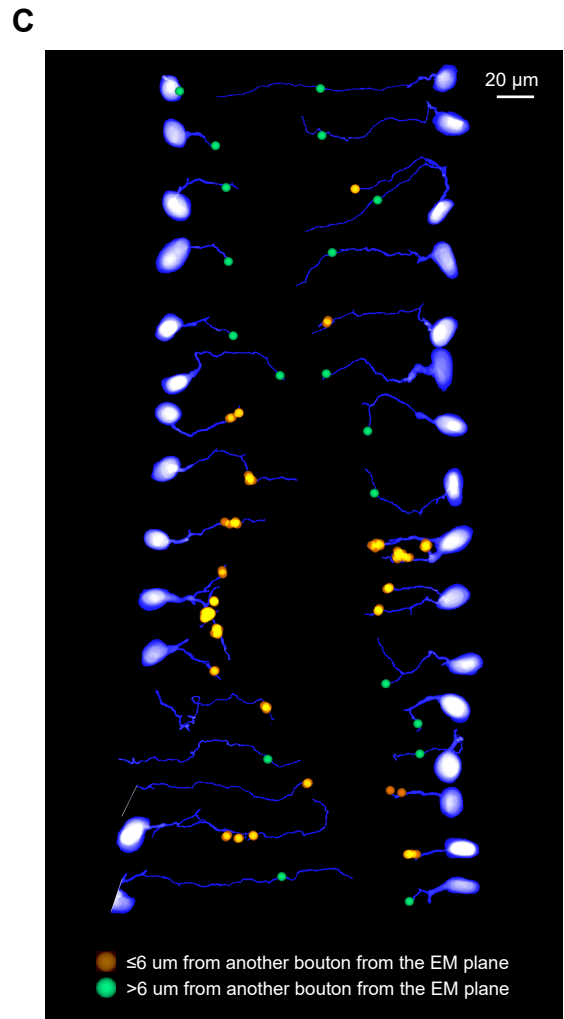

Supplement: NIHMS971485-supplement-6.pdf [file NIHMS971485-supplement-6.pdf]

# Figure S7

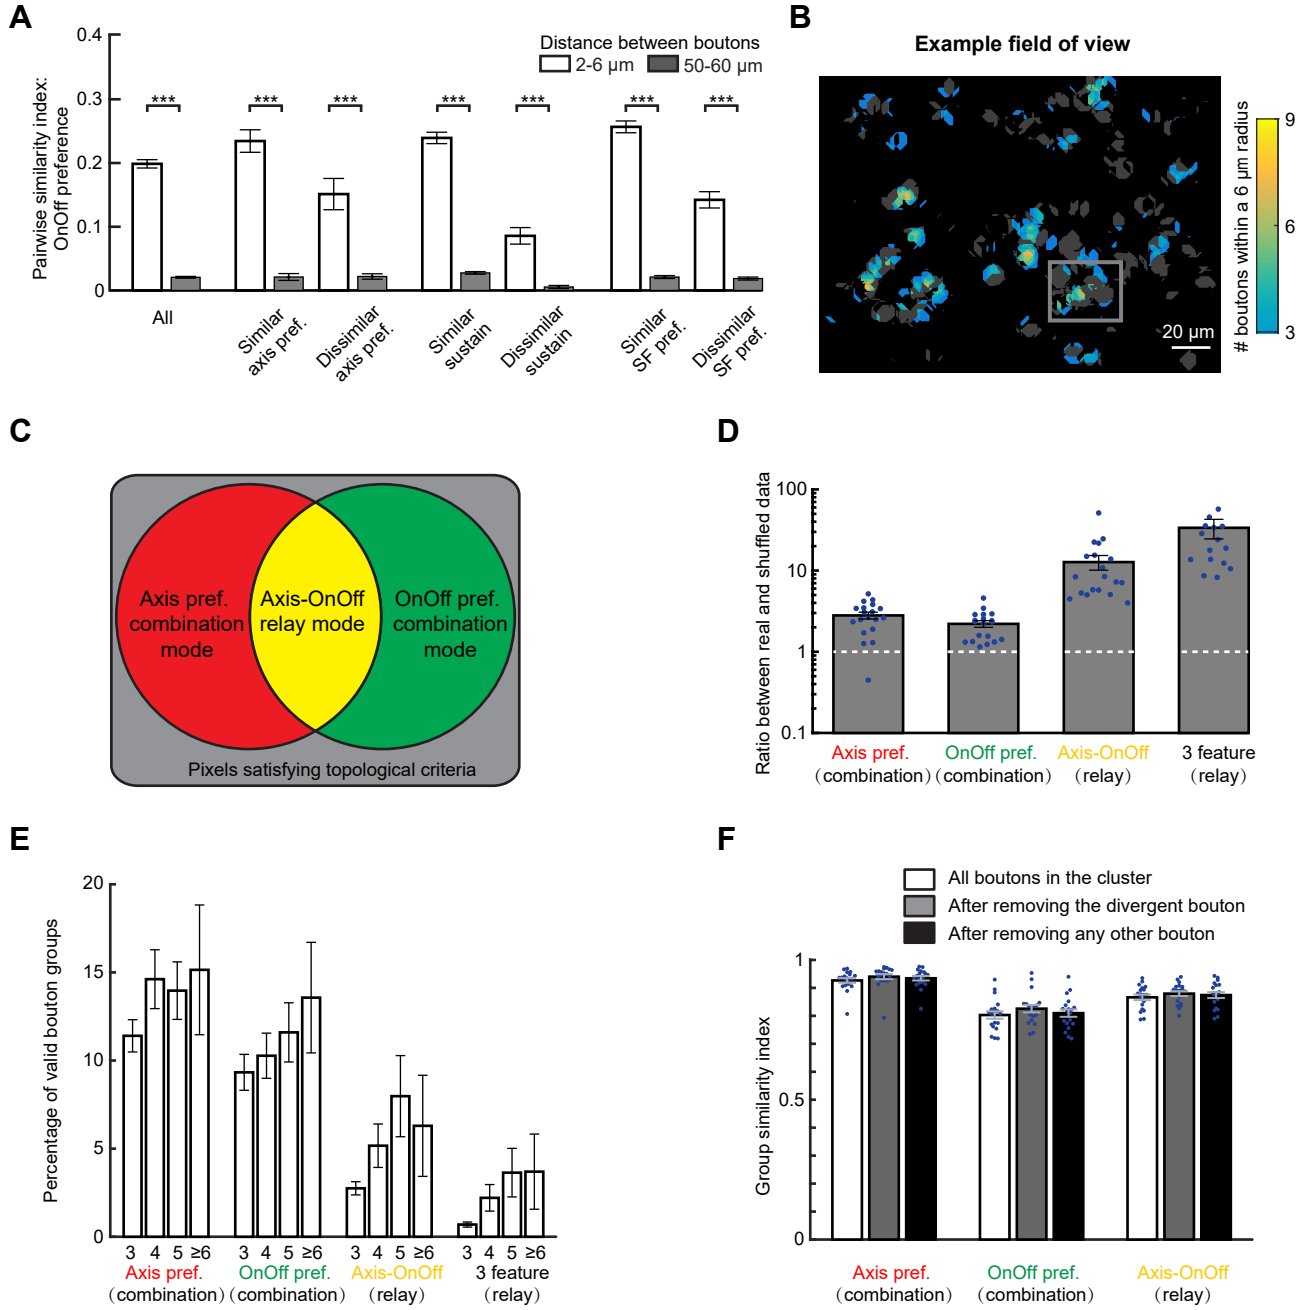

Supplement: NIHMS971485-supplement-7.pdf [file NIHMS971485-supplement-7.pdf]
